# Supplementary material for: Partnerships, Processes, and Outcomes: A Health Equity–Focused Scoping Meta-Review of Community-Engaged Scholarship
Source: PubMed Central journal article supplement (PMC8095013; doi:10.1146/annurev-publhealth-040119-094220), 2020-01-10
Supplement: NIHMS1551334-supplement-Search_Strategy.pdf [file NIHMS1551334-supplement-Search_Strategy.pdf]

## Supplemental Appendix: Search Strategy

### PubMed: 244 Results

(((((("Community Based Participatory Research" OR "Community Engaged Research" OR "Participatory Research" OR "Participatory Action Research" OR "Community Academic Partnership") OR "Community-Based Participatory Research"[Mesh])) AND systematic[sb])) OR ((("Community-Based Participatory Research"[Mesh] OR "Participatory Research" OR "Participatory Action Research" OR "Community Academic Partnership" OR "Community Engaged Research")AND (((Systematic[Title] OR Scoping[Title] OR Umbrella[Title] OR Systematized[Title] OR Mapping[Title] OR Evidence[Title] OR Rapid[Title] OR "State of the art"[Title]) AND Review[Title]) OR Meta-Analysis[Title]))

### Web of Science: 67

|       |                         |                                                                                                                                                                                  |                          |                          |
|-------|-------------------------|----------------------------------------------------------------------------------------------------------------------------------------------------------------------------------|--------------------------|--------------------------|
| # 4   | <a href="#">100</a>     | #2 AND #3                                                                                                                                                                        | <input type="checkbox"/> | <input type="checkbox"/> |
|       |                         | <i>Timespan=2004-2018</i>                                                                                                                                                        |                          |                          |
|       |                         | <i>Search language=Auto</i>                                                                                                                                                      |                          |                          |
| <hr/> |                         |                                                                                                                                                                                  |                          |                          |
| # 3   | <a href="#">194,579</a> | #1 OR TI=((Scoping OR Umbrella OR Systematized OR Mapping OR Evidence OR Rapid OR "State of the art") AND Review)                                                                | <input type="checkbox"/> | <input type="checkbox"/> |
| <hr/> |                         |                                                                                                                                                                                  |                          |                          |
| # 2   | <a href="#">11,611</a>  | TS=("Community Based Participatory Research" OR "Community Engaged Research" OR "Participatory Research" OR "Participatory Action Research" OR "Community Academic Partnership") | <input type="checkbox"/> | <input type="checkbox"/> |
| <hr/> |                         |                                                                                                                                                                                  |                          |                          |
| # 1   | <a href="#">176,770</a> | TI=("Systematic Review" OR "Meta-Analysis" OR (Systematic AND Literature AND Review))                                                                                            | <input type="checkbox"/> | <input type="checkbox"/> |

**CINAHL (130)**

| #  | Query                                                                                                                                                                                               |         |
|----|-----------------------------------------------------------------------------------------------------------------------------------------------------------------------------------------------------|---------|
| S3 | S1 AND S2                                                                                                                                                                                           | 188     |
| S2 | TX "Community Based Participatory Research" OR "Community Engaged Research" OR "Participatory Research" OR "Participatory Action Research" OR "Community Academic Partnership"                      | 6,572   |
| S1 | TI ( ((Systematic OR Scoping OR Umbrella OR Systematized OR Mapping OR Evidence OR Rapid OR "State of the art") AND Review) OR Meta-Analysis ) OR ( PT ( "Systematic Review" OR "Meta Analysis" ) ) | 101,194 |

**PsychINFO (28)**

| #  | Query                                                                                                                                                                          |        |
|----|--------------------------------------------------------------------------------------------------------------------------------------------------------------------------------|--------|
| S6 | S3 AND S4                                                                                                                                                                      | 30     |
| S5 | S3 AND S4                                                                                                                                                                      | 31     |
| S4 | TX "Community Based Participatory Research" OR "Community Engaged Research" OR "Participatory Research" OR "Participatory Action Research" OR "Community Academic Partnership" | 4,749  |
| S3 | S1 OR S2                                                                                                                                                                       | 34,087 |
| S2 | MR -Systematic Review OR MR META ANALYSIS                                                                                                                                      | 16,861 |
| S1 | TI ((Systematic OR Scoping OR Umbrella OR Systematized OR Mapping OR Evidence OR Rapid OR "State of the art") AND Review) OR Meta-Analysis )                                   | 28,405 |

Search Limits: 2004 to present, only scholarly journal articles (e.g. no Dissertations or books)
